# Supplementary material for: Analysis of the Differentiation of Kenyon Cell Subtypes Using Three Mushroom Body-Preferential Genes during Metamorphosis in the Honeybee (Apis mellifera L.)
Source: PubMed Central journal article supplement (PMC4924639; doi:10.1371/journal.pone.0157841), 2016-06-28

Clone No. 9

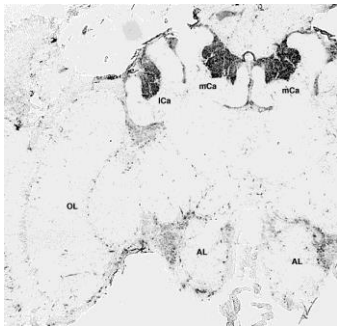

Clone No. 28

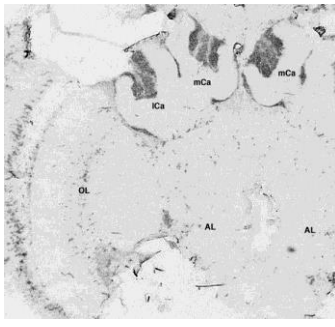

Clone No. 60

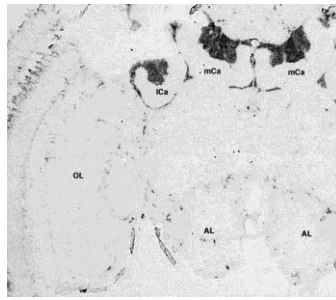

Clone No. 105

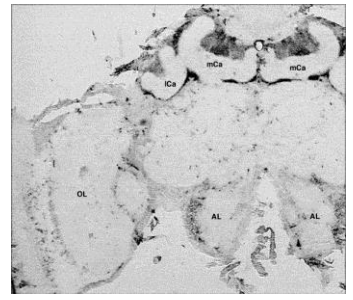

Clone No. 116

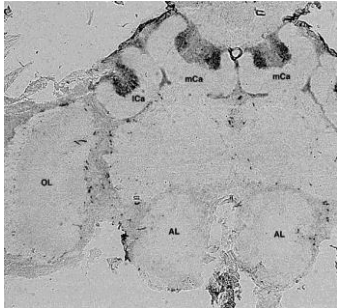

Clone No. 231

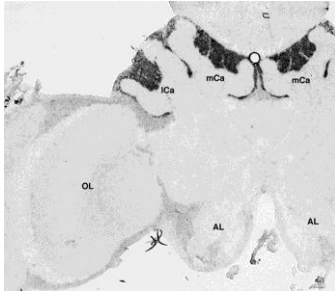

Clone No. 299

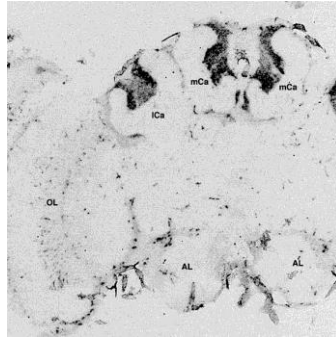

Clone No. 302

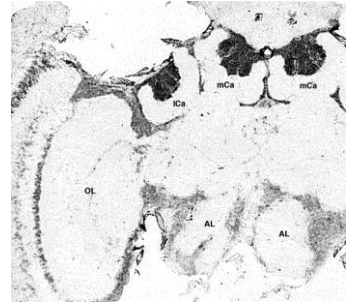

Clone No. 314

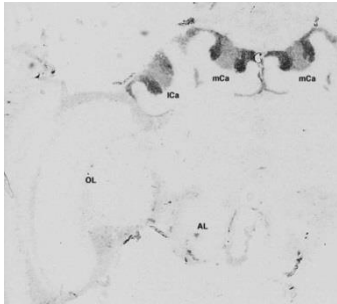

Clone No. 387

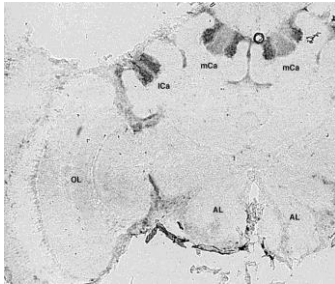

Clone No. 440

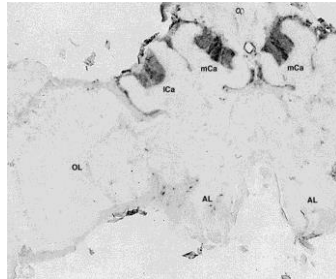

Clone No. 443

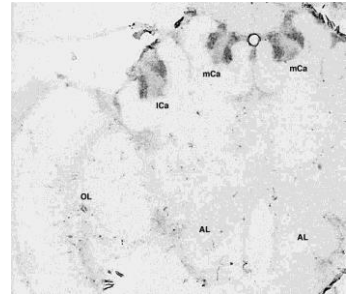

Clone No. 463

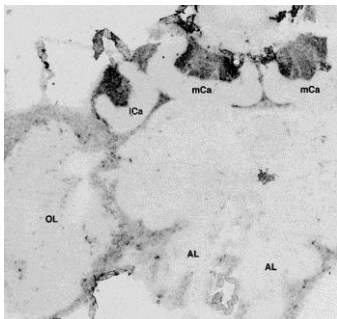

Clone No. 466

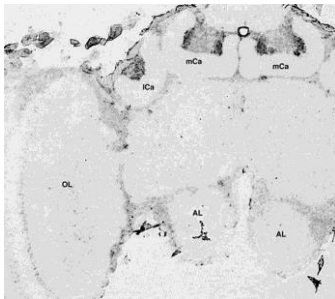

Clone No. 495

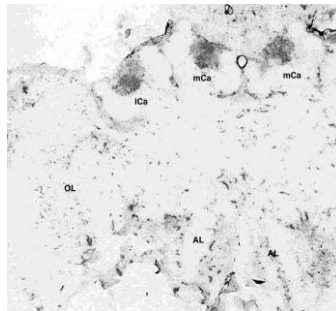

Clone No. 523

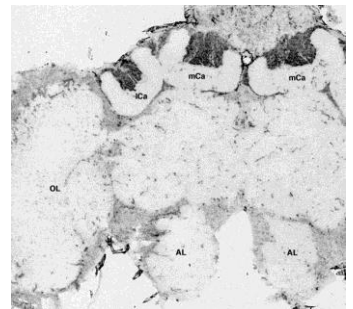

Clone No. 539

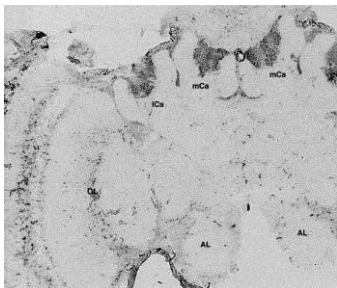

Clone No. 567

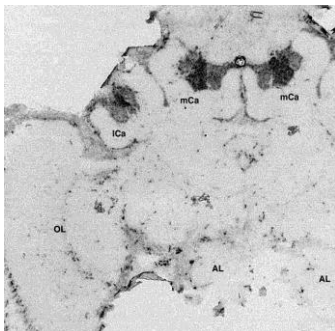

Supplement: pone.0157841.s001.pdf [file pone.0157841.s001.pdf]
