# Supplementary material for: Analysis of the Differentiation of Kenyon Cell Subtypes Using Three Mushroom Body-Preferential Genes during Metamorphosis in the Honeybee (Apis mellifera L.)
Source: PubMed Central journal article supplement (PMC4924639; doi:10.1371/journal.pone.0157841), 2016-06-28

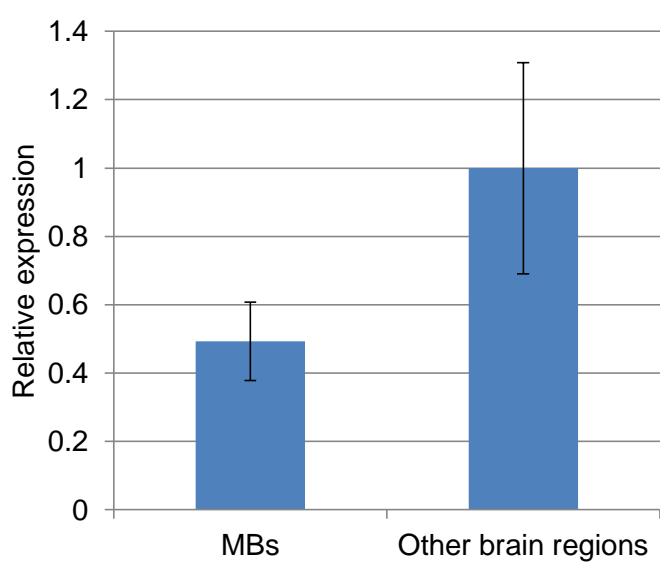

Supplement: pone.0157841.s002.pdf [file pone.0157841.s002.pdf]
